# Supplementary material for: Determinants of Elevated D-Dimer Levels and Long-Term Outcome in Elderly Patients With End-Stage Heart Failure
Source: Research Square preprint supplement (doi:10.21203/rs.3.rs-382715/v1), 2021-04-19
Supplement: Supplementary file 1 [file a81686f3db8cfaefa2561ccd.docx]

Interview items

We conducted telephonic interviews with the participants.

Question: Is the patient alive now?

Notice:

1.The interviews should be conducted with unfailing patience. The reason is that most participants enrolled in the currently study are very old and weak due to severe heart failure.

2. The interviews should be conducted by a doctor. The reason is that participants may need some medical consultations during the interview.
